# Supplementary material
Source: PubMed Central journal article supplement (PMC7114166)
Supplement: ao9b04029_si_001.pdf [file ao9b04029_si_001.pdf]

## **Supplementary Information**

### **Polypyrrole/carbon nanotube freestanding electrode with excellent electrochemical properties for high-performance all-solid-state supercapacitors**

Jincy Parayangattil Jyothisbasu,<sup>a,b</sup> Ming-Zhu Chen<sup>a</sup>, and Rong-Ho Lee<sup>\*a</sup>

<sup>a</sup>Department of Chemical Engineering, National Chung Hsing University, Taichung 402,  
Taiwan

<sup>b</sup>Department of Environmental Engineering, National Chung Hsing University, Taichung 402,  
Taiwan

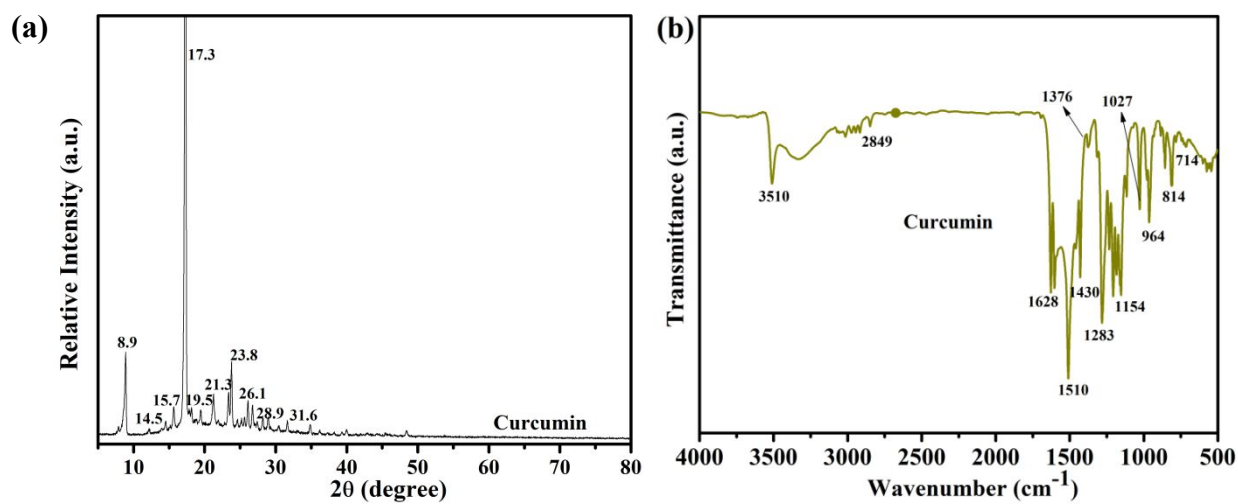

Figure S1. (a) XRD pattern and (b) FTIR spectrum of curcumin.

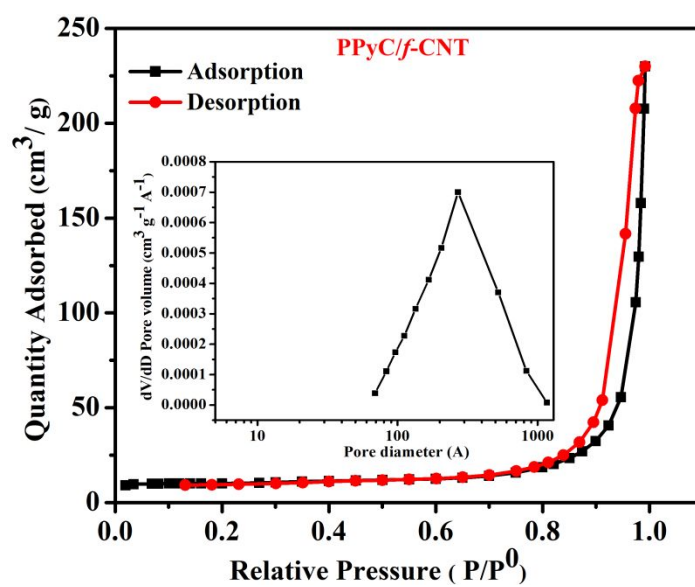

Figure S2. Nitrogen sorption isotherm and pore size distribution curve of PPyC/f-CNT freestanding film.

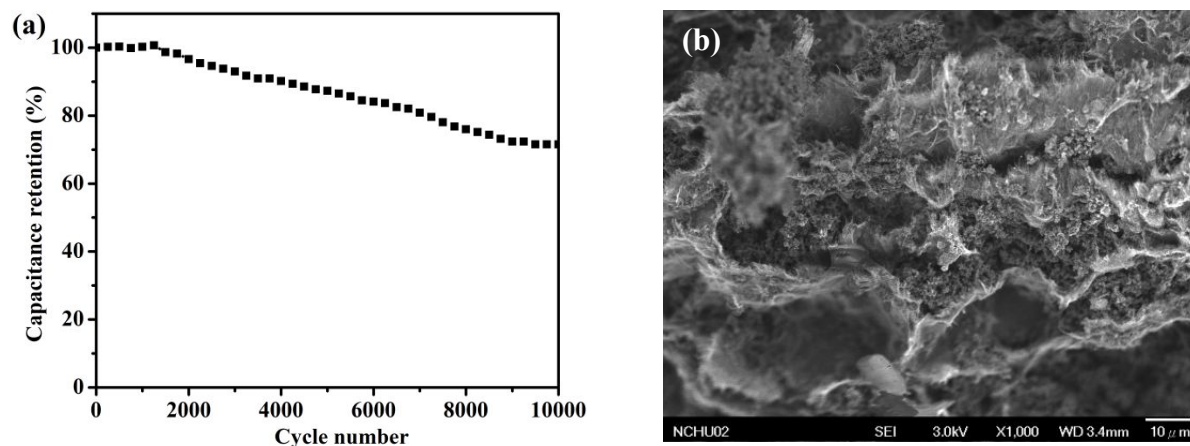

**Figure S3.** (a) Cyclic performance of the PPyNP/*f*-CNT freestanding electrode recorded at a current density of 60 mA cm<sup>-2</sup> for 10,000 charge/discharge cycles, and (b) SEM image of PPyNP/*f*-CNT electrode freestanding electrode after cycling test.

**Table S1** Capacitive performances of PPy-based composite electrodes reported previously in the literature and in this present study

| Electrode materials                                      | Active material loading   | Current collector                                | Specific capacitance of electrode ( $C_s$ )                                                                                   | Reference                                                                                                                                        |
|----------------------------------------------------------|---------------------------|--------------------------------------------------|-------------------------------------------------------------------------------------------------------------------------------|--------------------------------------------------------------------------------------------------------------------------------------------------|
| PPyNP/f-CNT                                              | 14.0 mg cm <sup>-2</sup>  | Freestanding electrode                           | 4585 mF cm <sup>-2</sup> (327.5 F g <sup>-1</sup> , 176.35 F cm <sup>-3</sup> ) at a current density of 2 mA cm <sup>-2</sup> | This study                                                                                                                                       |
| PPy-coated air-laid paper                                | –                         | Freestanding electrode                           | 3100 mF cm <sup>-2</sup> at a current density of 1 mA cm <sup>-2</sup>                                                        | Advanced Energy Materials 7(21) (2017) 1701247                                                                                                   |
| Polypyrrole/nylon membrane composite film                | 5 mg cm <sup>-2</sup>     | Freestanding electrode without current collector | 2911.4 mF cm <sup>-2</sup> at a current density of 1 mA cm <sup>-2</sup>                                                      | <i>Journal of Materiomics</i> , 2019, DOI: <a href="https://doi.org/10.1016/j.jmat.2019.11.004">https://doi.org/10.1016/j.jmat.2019.11.004</a> . |
| ECNT/PPy                                                 | 3.89 mg cm <sup>-2</sup>  | Freestanding electrode                           | 965.3 mF cm <sup>-2</sup> at a current density of 1 mA cm <sup>-2</sup>                                                       | Chemical Engineering Journal 337 (2018) 552-559                                                                                                  |
| PPy-coated knitted fabric                                | 12.3 mg cm <sup>-2</sup>  | Freestanding electrode                           | 4117 mF cm <sup>-2</sup> at a current density of 2 mA cm <sup>-2</sup>                                                        | Journal of Materials Chemistry A 4(33) (2016) 12981-12986                                                                                        |
| Polypyrrole/graphene/bacterial cellulose paper electrode | 8.93 mg cm <sup>-2</sup>  | Freestanding electrode                           | 2100 mF cm <sup>-2</sup> at a current density of 2 mA cm <sup>-2</sup>                                                        | Composites Science and Technology 137 (2016) 87-93                                                                                               |
| BC/PPy nanofibres/MWCNTs electrode                       | 11.23 mg cm <sup>-2</sup> | Freestanding electrode                           | 2.43 F cm <sup>-2</sup> at a discharge current of 2 mA cm <sup>-2</sup>                                                       | Nano Energy 9 (2014) 309-317                                                                                                                     |
| PPy nanofiber–MWCNT electrodes                           | 30 mg cm <sup>2</sup>     | Ni foam                                          | 4.62 F cm <sup>2</sup> at a scan rate of 2 mV s <sup>-1</sup>                                                                 | Journal of Materials Chemistry A 1(38) (2013) 11614-11622                                                                                        |
| Free-standing reduced graphene oxide/polypyrrole/cell    | –                         | Freestanding electrode                           | 1.20 F cm <sup>-2</sup> at 2 mA cm <sup>-2</sup>                                                                              | Journal of Materials Chemistry A 5(8) (2017)                                                                                                     |

|                                                                                               |                          |                        |                                                                         |                                                           |
|-----------------------------------------------------------------------------------------------|--------------------------|------------------------|-------------------------------------------------------------------------|-----------------------------------------------------------|
| ulose hybrid papers                                                                           |                          |                        |                                                                         | 3819-3831                                                 |
| PPy-coated cotton fabrics                                                                     | 9.9 mg cm <sup>-2</sup>  | Freestanding electrode | 3090.6 mF cm <sup>-2</sup> at 2 mA cm <sup>-2</sup>                     | RSC Advances 7(77) (2017) 48934-48941                     |
| Graphene/activated carbon/polypyrrole (GN/AC/PPy)                                             | 2.75 mg cm <sup>-2</sup> | Freestanding electrode | 906 mF cm <sup>-2</sup> at a current density of 0.5 mA cm <sup>-2</sup> | RSC Advances 7(50) (2017) 31342-31351                     |
| PPy/paper composite electrode                                                                 | 3.54 mg cm <sup>-2</sup> | Freestanding electrode | 1.5 F cm <sup>-2</sup> at 1 mA cm <sup>-2</sup>                         | Energy & Environmental Science 6(2) (2013) 470-476        |
| rGO/PPy NT paper                                                                              | 2.46 mg cm <sup>-2</sup> | Carbon paper           | 807 mF cm <sup>-2</sup> at 1 mA cm <sup>-2</sup>                        | Journal of Power Sources 302 (2016) 39-45                 |
| Carbon fiber paper-supported polypyrrole (CFP/PPy)                                            | 0.6 mg cm <sup>-2</sup>  | Carbon fiber paper     | 198.5 mF cm <sup>-2</sup> at 1 mA cm <sup>-2</sup>                      | Journal of Materials Chemistry A 2(5) (2014) 1458-1464    |
| Polypyrrole on vertically aligned carbon nanotube arrays/carbon fiber paper (PPy/VA-CNTs/CFP) | 0.84 mg cm <sup>-2</sup> | Carbon fiber paper     | 0.78 F cm <sup>-2</sup> at 2 mV s <sup>-1</sup>                         | Journal of Materials Chemistry A 3(44) (2015) 22043-22052 |
